# Supplementary material for: Effects of Clinicopathological Characteristics on the Survival of Patients Treated with PD-1/PD-L1 Inhibitor Monotherapy or Combination Therapy for Advanced Cancer: A Systemic Review and Meta-Analysis
Source: PubMed Central journal article supplement (PMC7762667; doi:10.1155/2020/5269787), 2020-12-18
Supplement: 5269787.f1.pdf [file 5269787.f1.pdf]

## Supplementary Materials

**Table S1** Risk of bias

| Study                  | Radom sequence generation | Allocation concealment | Blinding of participants and personel | Blinding of outcome assessment | Incompletement outcome data | Selective reporting | Other bias |
|------------------------|---------------------------|------------------------|---------------------------------------|--------------------------------|-----------------------------|---------------------|------------|
| Antonia SJ 2018        | +                         | +                      | +                                     | +                              | +                           | +                   | +          |
| Bellmunt J 2017        | +                         | +                      | -                                     | -                              | +                           | +                   | +          |
| Borghaei H 2015        | +                         | +                      | -                                     | -                              | +                           | +                   | +          |
| Brahmer J 2015         | +                         | +                      | ?                                     | ?                              | +                           | +                   | +          |
| Carbone DP 2017        | +                         | +                      | -                                     | -                              | +                           | +                   | +          |
| Fehrenbacher L<br>2016 | +                         | +                      | -                                     | -                              | +                           | +                   | +          |
| Ferris RL 2016         | +                         | +                      | -                                     | -                              | +                           | +                   | +          |
| Gandhi L 2018          | +                         | +                      | +                                     | +                              | +                           | +                   | +          |
| Herbst RS 2016         | +                         | +                      | -                                     | -                              | +                           | +                   | +          |
| Horn L 2018            | +                         | +                      | +                                     | ?                              | +                           | +                   | +          |
| Kang YK 2017           | +                         | +                      | +                                     | +                              | +                           | +                   | +          |
| Motzer RJ 2015         | +                         | +                      | -                                     | ?                              | +                           | +                   | +          |
| Motzer RJ 2018         | +                         | +                      | -                                     | +                              | +                           | +                   | +          |

---

|                  |   |   |   |   |   |   |   |
|------------------|---|---|---|---|---|---|---|
| Paz-Ares L 2018  | + | + | + | + | + | + | + |
| Powles T 2018    | + | + | - | - | + | + | + |
| Rittmeyer A 2016 | + | + | - | - | + | + | + |
| Robert C 2015    | + | ? | + | + | + | + | + |
| Shitara K 2018   | + | + | + | - | + | + | + |

---

+ Low risk of bias; ? unclear risk of bias; - high risk of bias

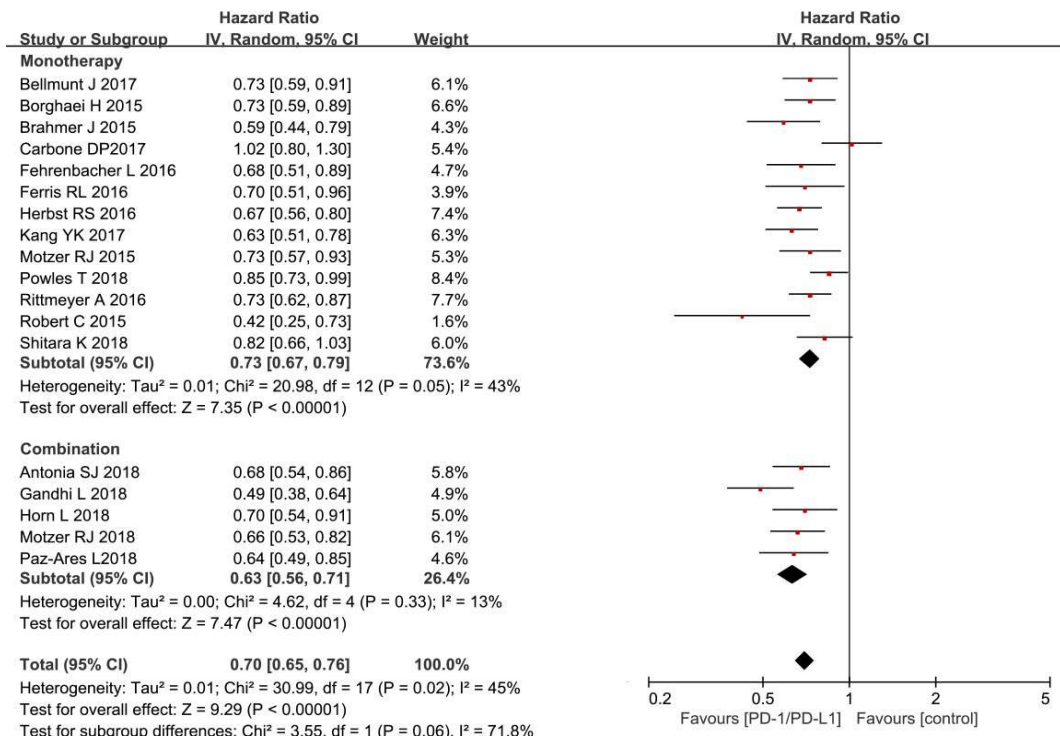

**Figure S1** Forest plot of hazard ratio comparing overall survival in patients who received PD-1/PD-L1 inhibitors versus control for monotherapy group and combination therapy group.

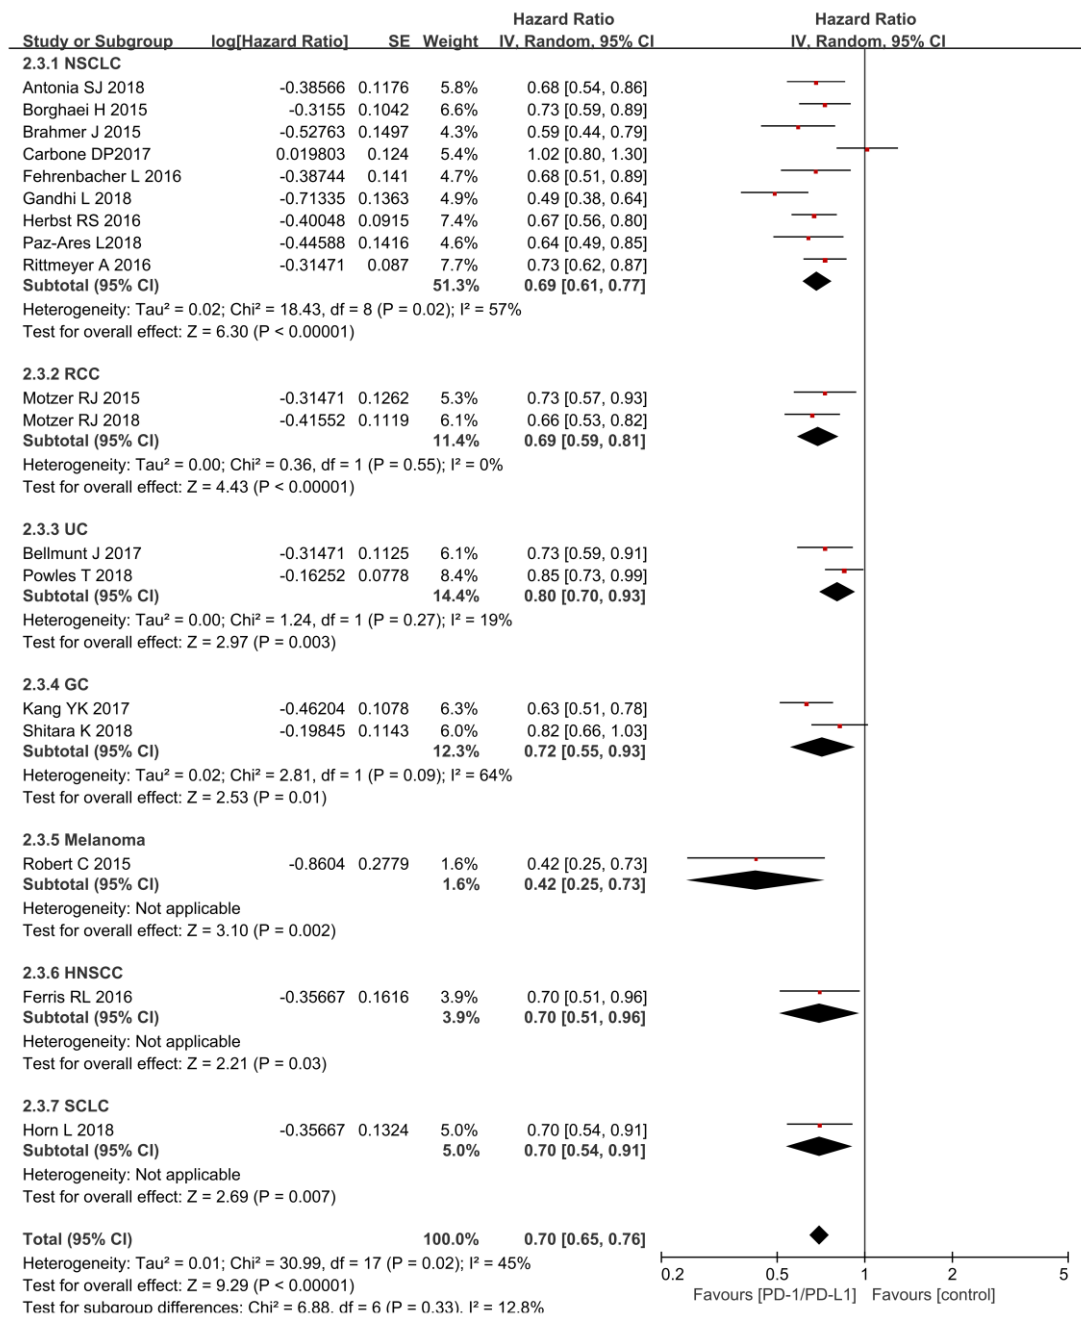

**Figure S2** Forest plot of hazard ratio comparing overall survival in patients who received PD-1/PD-L1 inhibitors versus control by tumor types.

Monotherapy (age subgroup)

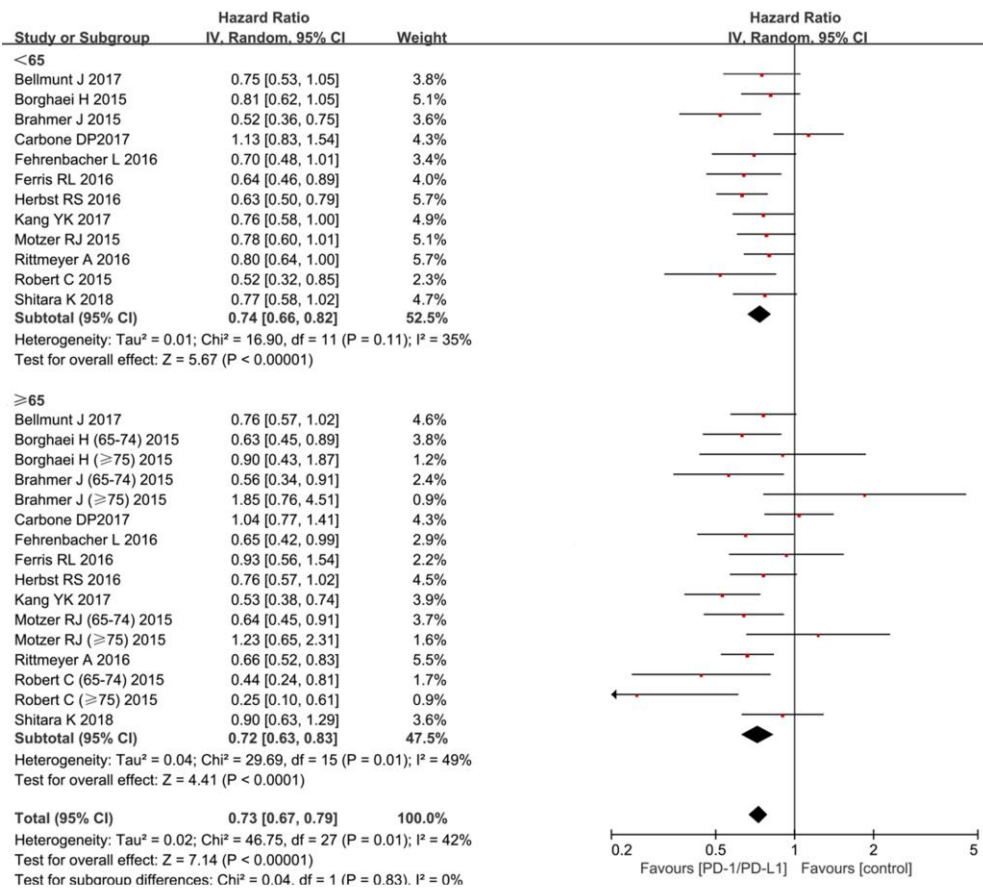

Combination therapy (age subgroup)

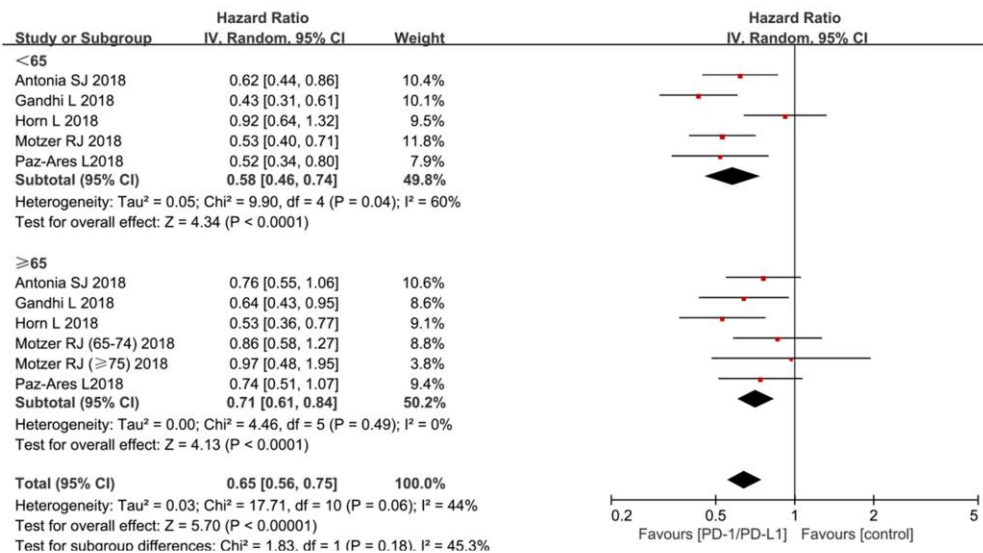

**Figure S3** Forest plot of hazard ratio comparing overall survival in patients who received PD-1/PD-L1 inhibitors versus control by age for (A) monotherapy group and (B) combination therapy group.

Monotherapy (ECOG PS subgroup)

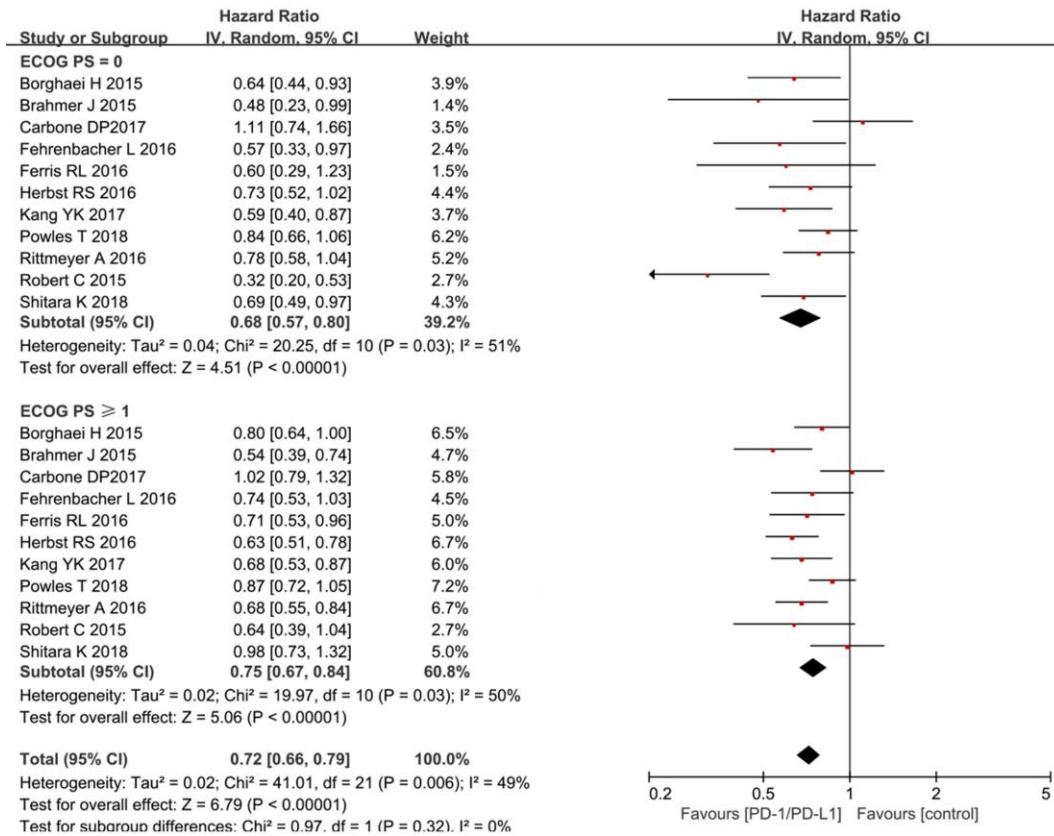

Combination therapy (ECOG PS subgroup)

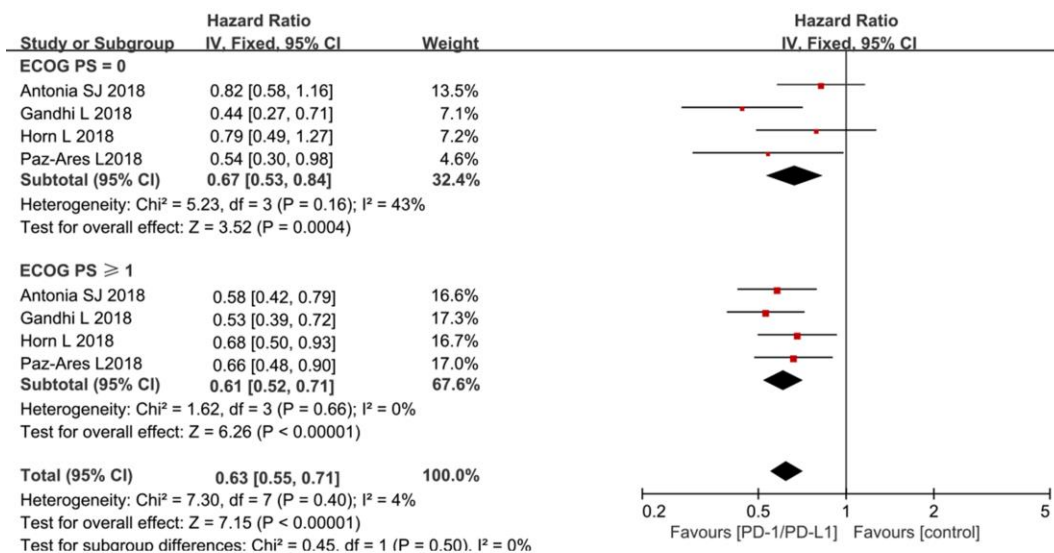

**Figure S4** Forest plot of hazard ratio comparing overall survival in patients who received PD-1/PD-L1 inhibitors versus control by ECOG PS for (A) monotherapy group and (B) combination therapy group.

Monotherapy (smoking subgroup)

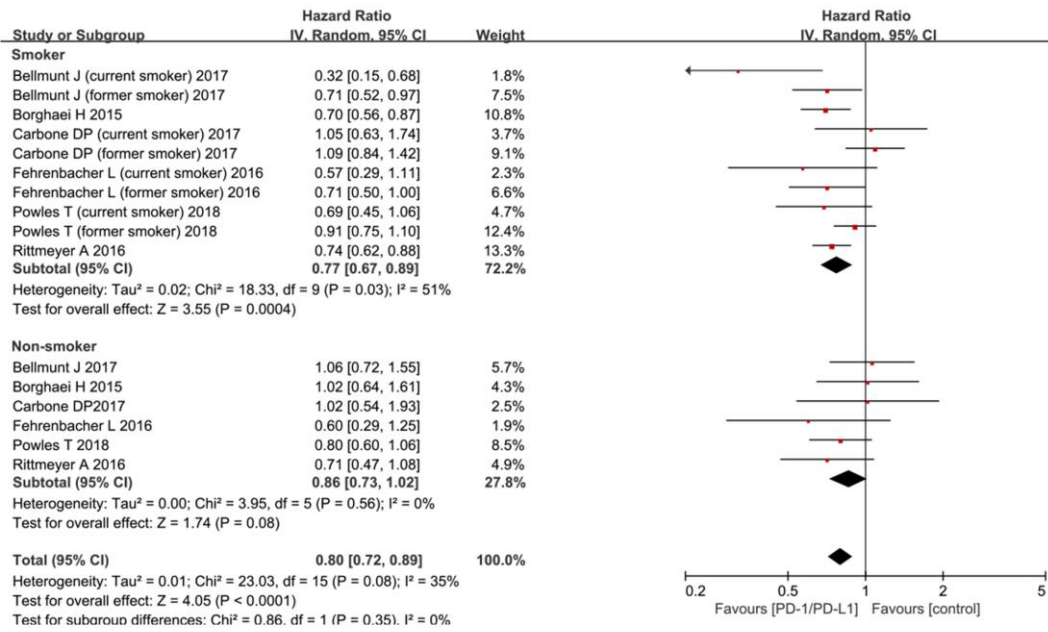

Combination therapy (smoking subgroup)

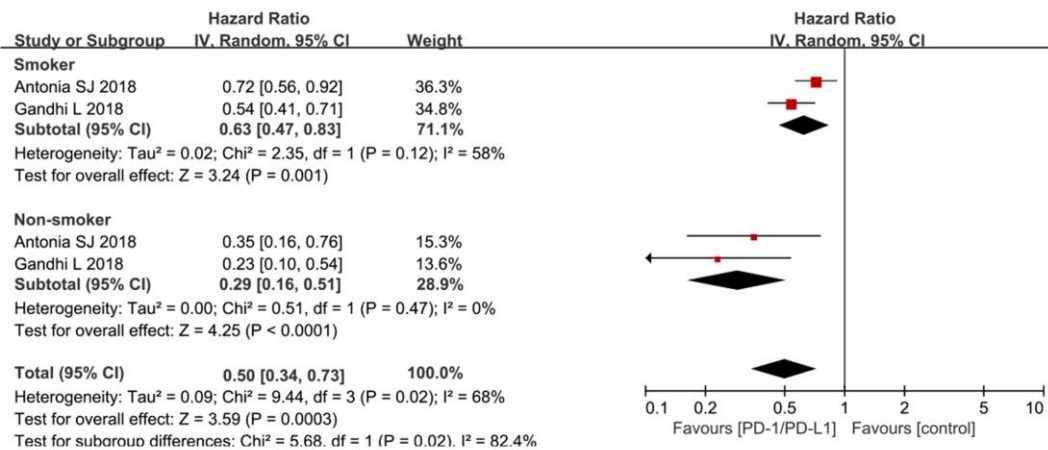

**Figure S5** Forest plot of hazard ratio comparing overall survival in patients who received PD-1/PD-L1 inhibitors versus control by smoking status. (A) monotherapy group and (B) combination therapy group.

Monotherapy (liver metastasis subgroup)

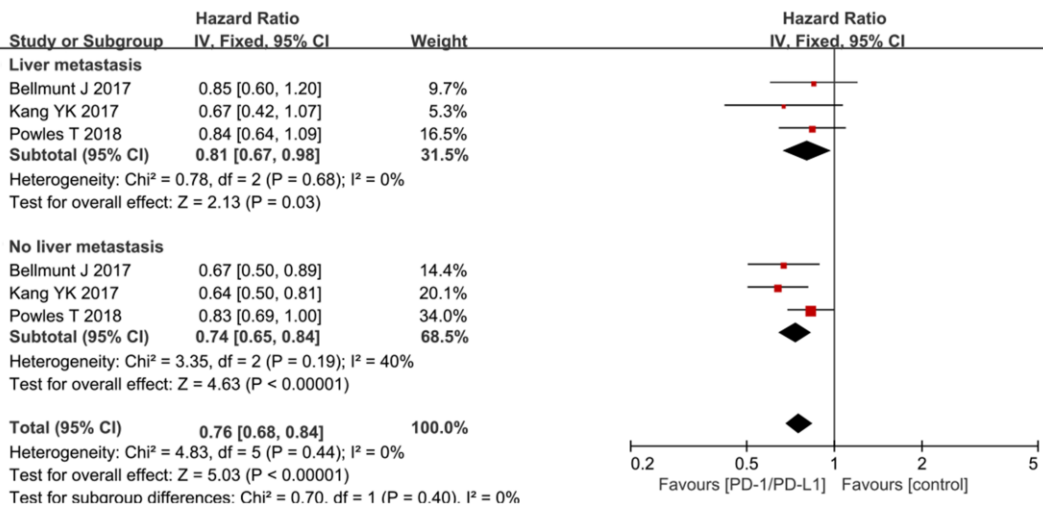

Combination therapy (liver metastasis subgroup)

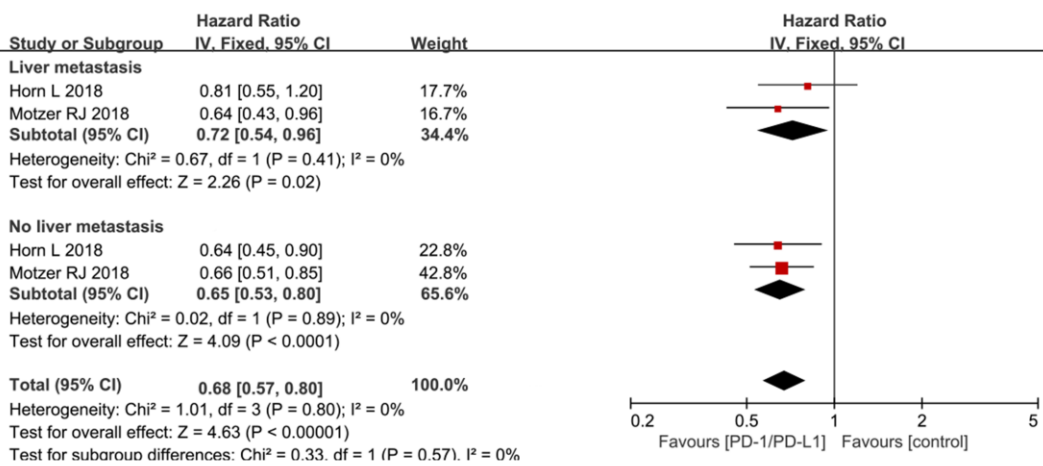

**Figure S6** Forest plot of hazard ratio comparing overall survival in patients who received PD-1/PD-L1 inhibitors versus control by liver metastasis for (A) monotherapy group and (B) combination therapy group.



Monotherapy (PD-L1 subgroup)

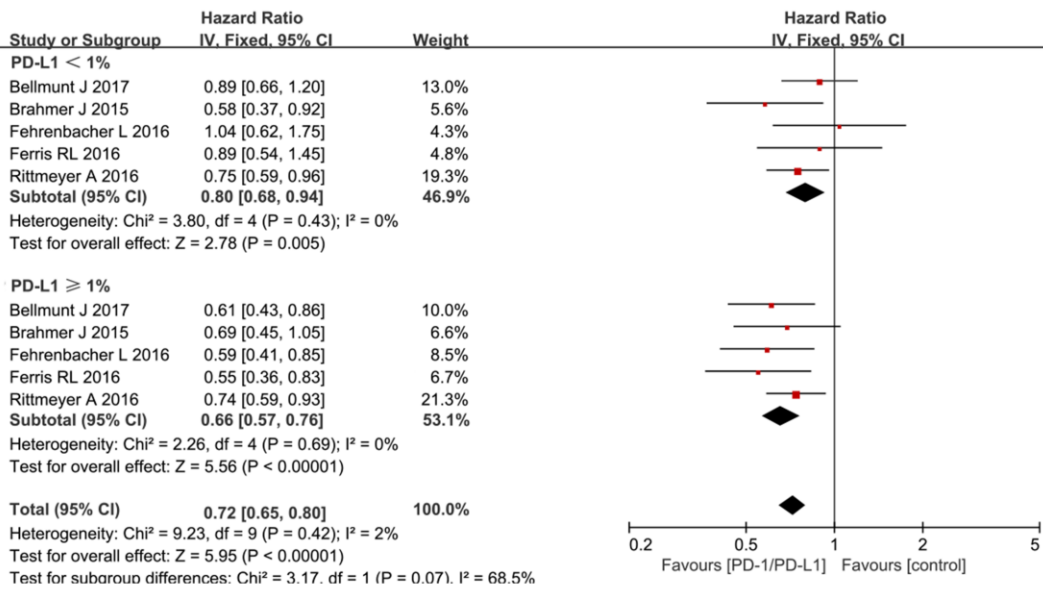

Combination therapy (PD-L1 subgroup)

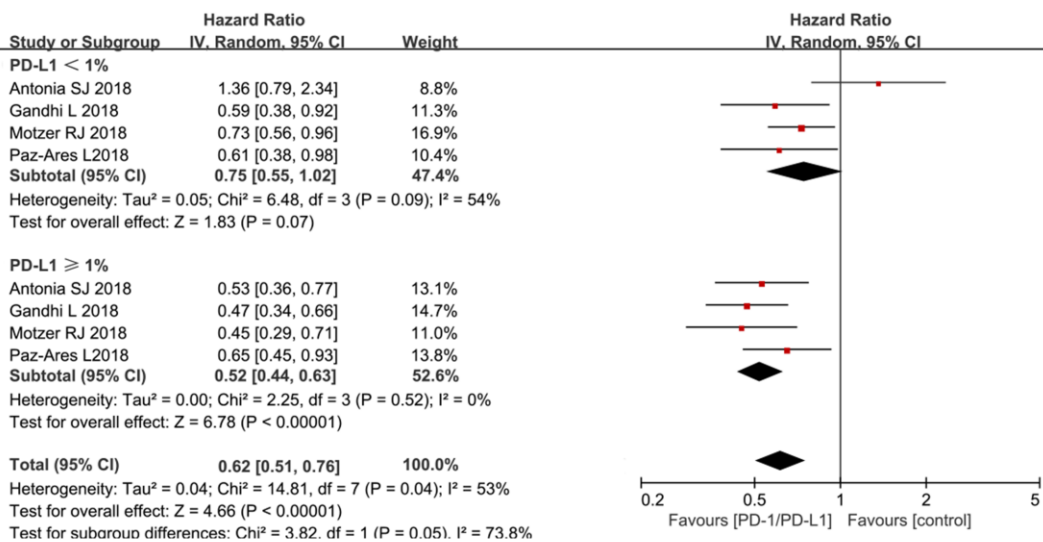

**Figure S7** Forest plot of hazard ratio comparing overall survival in patients who received

PD-1/PD-L1 inhibitors versus control by PD-L1 expression for (A) monotherapy group and (B)

combination therapy group.

Monotherapy (EGFR subgroup)

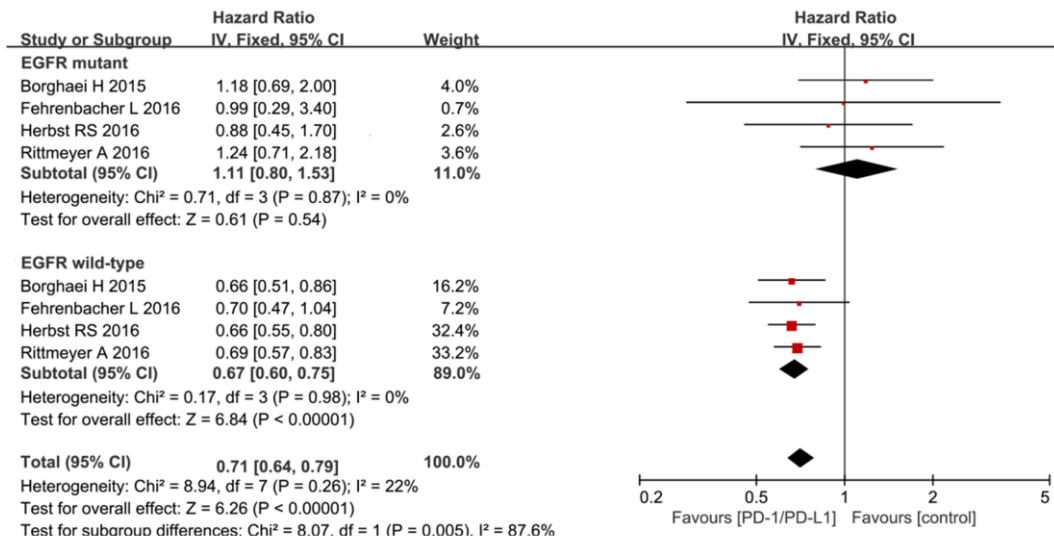

Monotherapy (KRAS subgroup)

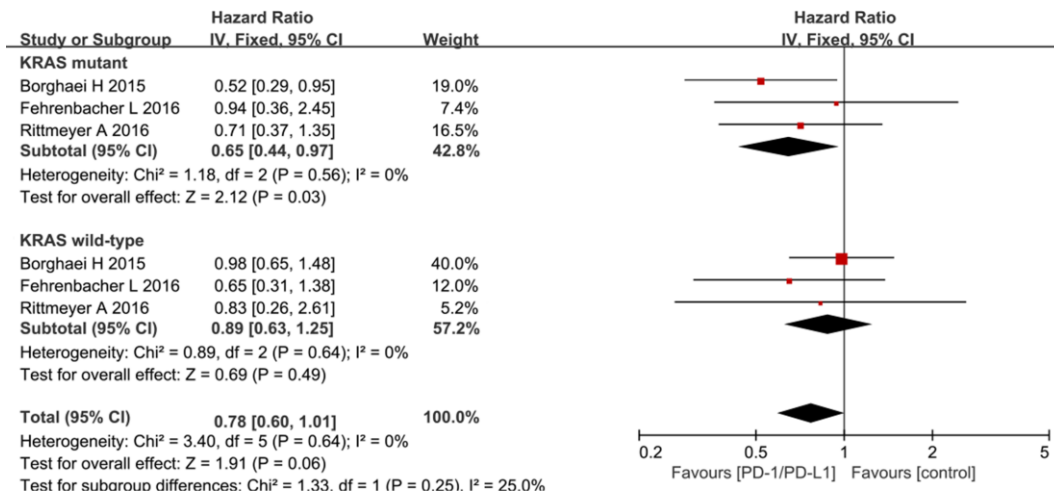

**Figure S8** Forest plot of hazard ratio comparing overall survival in patients who received PD-1/PD-L1 inhibitors versus control for monotherapy group by (A) EGFR status and (B) KRAS status.
